# Supplementary material for: Improved CCD tropospheric ozone from S5P TROPOMI satellite data using local cloud fields
Source: Copernicus journal article supplement (doi:10.5194/egusphere-2023-2825), 2024-02-23
Supplement: Supplementary file [file egusphere-2023-2825-CC1-supplement.pdf]

Comments by Owen R. Cooper (TOAR Scientific Coordinator of the Community Special Issue) on:

### **Improved CCD tropospheric ozone from S5P TROPOMI satellite data using local cloud fields**

Swathi Maratt Satheesan, Kai-Uwe Eichmann, John P. Burrows, Mark Weber, Ryan Stauffer, Anne M. Thompson, and Debra Kollonige

EGUsphere [preprint], <https://doi.org/10.5194/egusphere-2023-2825>, 2024

Discussion started: 23 Feb 2024; Discussion closes March 29, 2024

This review is by Owen Cooper, TOAR Scientific Coordinator of the TOAR-II Community Special Issue. I, or a member of the TOAR-II Steering Committee, will post comments on all papers submitted to the TOAR-II Community Special Issue, which is an inter-journal special issue accommodating submissions to six Copernicus journals: ACP (lead journal), AMT, GMD, ESSD, ASCMO and BG. The primary purpose of these reviews is to identify any discrepancies across the TOAR-II submissions, and to allow the author teams time to address the discrepancies. Additional comments may be included with the reviews. While O. Cooper and members of the TOAR Steering Committee may post open comments on papers submitted to the TOAR-II Community Special Issue, they are not involved with the decision to accept or reject a paper for publication, which is entirely handled by the journal's editorial team.

#### **General Comments:**

TOAR-II has produced two guidance documents to help authors develop their manuscripts so that results can be consistently compared across the wide range of studies that will be written for the TOAR-II Community Special Issue. Both guidance documents can be found on the TOAR-II webpage:

<https://igacproject.org/activities/TOAR/TOAR-II>

*The TOAR-II Community Special Issue Guidelines:* In the spirit of collaboration and to allow TOAR-II findings to be directly comparable across publications, the TOAR-II Steering Committee has issued this set of guidelines regarding style, units, plotting scales, regional and tropospheric column comparisons, tropopause definitions and best statistical practices.

*Guidance note on best statistical for TOAR analyses:* The aim of this guidance note is to provide recommendations on best statistical practices and to ensure consistent communication of statistical analysis and associated uncertainty across TOAR publications. The scope includes approaches for reporting trends, a discussion of strengths and weaknesses of commonly used techniques, and calibrated language for the communication of uncertainty. Table 3 of the TOAR-II statistical guidelines provides calibrated language for describing trends and uncertainty, similar to the approach of IPCC, which allows trends to be discussed without having to use the problematic expression, "statistically significant".

#### **Major Comments:**

This manuscript describes the new CHORA (Cloud Height Ozone Reference Algorithm) algorithm for retrieving tropospheric ozone columns from TROPOMI, which improves upon the standard CCD (Convective Cloud Differential) approach that uses cloud data from the Pacific region. The topic is relevant to TOAR-II and the product will be useful to the scientific community. I see no discrepancies between this paper and the other papers that have been submitted to the TOAR-II Community Special Issue so far. I have a few suggestions to improve the description of the method, and to cite relevant work from TOAR and other research groups, as follows:

The region of the subtropics does not have a clear definition. According to the AMS Glossary of Meteorology (<https://glossary.ametsoc.org/wiki/Subtropics>) the subtropics is vaguely defined as: “The indefinite belts in each hemisphere between the regions of tropical and temperate climates.” It would be helpful if the Methods section can define your interpretation of the latitude bounds of the tropics, subtropics and mid-latitudes. It seems that you are using 20 degrees as the boundary of the tropics and subtropics. It also seems that you are classifying Hilo as tropical even though it is very close to the latitude of Hanoi, and even though it is impacted by mid-latitude air masses (and stratospheric intrusions) like the other subtropical sites. Is there a compelling reason to treat Hilo separately from the subtropical sites?

In several places the paper discusses the potential impact of stratospheric intrusions in the tropics, but provides few citations that describe this process. Nice overviews of the location and frequency of stratospheric intrusions are provided by Škerlak et al. (2014) and Škerlak et al. (2015). In terms of intrusions directly impacting the Hilo ozonesonde station (located near Mauna Loa Observatory), the first study to show that stratospheric ozone can impact Mauna Loa was Hübner et al. (1992); other studies are Cooper et al. (2005) and Lin et al. (2014).

#### Introduction

When summarizing global tropospheric ozone trends, a concise summary can be found in Chapter 2 (Section 2.2.5.3) of IPCC AR6 (Gulev et al, 2021). The earliest known free tropospheric ozone observations (mid-20<sup>th</sup> century) are reviewed by Tarasick and Galbally et al. 2019 (a paper from the first phase of TOAR), which were lower than the present-day, although the data coverage was very limited.

Dr. Klaus-Peter Heue posted an open comment on this paper and pointed out that 15-20 ozone profiles per month are required to produce an accurate monthly mean. This number was established by earlier work published by Logan (1999) and Saunio et al. (2012), which focused on mid-latitudes. A new study submitted to the TOAR-II Community Special Issue shows similar results for the tropics by focusing on free-tropospheric ozone measured at Mauna Loa Observatory (Chang et al., 2024).

#### **Minor Comments:**

line 32

smog is not a scientific term and should be replaced by something like air quality

line 32

Regarding the potential impacts of ozone on animals, it seems likely that animals would be affected, but I don't know of any studies that have ever demonstrated this link. Can you find an authoritative reference?

line 32

While Paul Crutzen made key contributions to the field of ozone research, his description of the Anthropocene is not a good reference for the impact of ozone on human health, vegetation, or climate. It would be more appropriate to cite IPCC and the TOAR-I papers (Fleming and Doherty et al., 2018; Mills et al., 2018; Gaudel et al., 2018; Szopa et al., 2021).

line 46

change lifespan to lifetime

line 46-49

The purpose of this sentence is to demonstrate that tropospheric ozone's high spatial and temporal variability poses a challenge to satellite monitoring. I don't understand how the paper by Kgabi and Sehlolo (2012) is relevant. This paper does not seem to be indexed with Web of Science, although I

could find it through Google Scholar. It focuses on urban ozone in Johannesburg, and one nearby rural site, so it does not provide any kind of broad regional or global overview. Again, the TOAR-I papers would be very appropriate, and there are new papers submitted to the TOAR-II Community Special Issue that also provide large-scale regional and continental surveys, such as Putero et al., 2023, and Seguel et al., 2024.

line 159

the word “before” is not necessary

line 261

A paper that looks at ozone increases over Hanoi is Ogino et al., 2022. Another recent paper that looks at ozone increases about Southeast Asia is Li et al., 2023.

## References:

Chang, K.-L., Cooper, O. R., Gaudel, A., Petropavlovskikh, I., Effertz, P., Morris, G., and McDonald, B. C.: Technical note: Challenges of detecting free tropospheric ozone trends in a sparsely sampled environment, *EGUsphere* [preprint], <https://doi.org/10.5194/egusphere-2023-2739>, 2024.

Cooper, O. R., et al. (2005), Direct transport of midlatitude stratospheric ozone into the lower troposphere and marine boundary layer of the tropical Pacific Ocean, *J. Geophys. Res.*, 110, D23310, doi:10.1029/2005JD005783.

Fleming, Z. L., R. M. Doherty, E. von Schneidmesser, C. S. Malley, et al. (2018), Tropospheric Ozone Assessment Report: Present-day ozone distribution and trends relevant to human health, *Elem Sci Anth*, 6(1):12, DOI: <https://doi.org/10.1525/elementa.273>

Gaudel, A., et al. (2018), Tropospheric Ozone Assessment Report: Present-day distribution and trends of tropospheric ozone relevant to climate and global atmospheric chemistry model evaluation, *Elem. Sci. Anth.*, 6(1):39, DOI: <https://doi.org/10.1525/elementa.291>

Gulev, S.K., P.W. Thorne, J. Ahn, F.J. Dentener, C.M. Domingues, S. Gerland, D. Gong, D.S. Kaufman, H.C. Nnamchi, J. Quaas, J.A. Rivera, S. Sathyendranath, S.L. Smith, B. Trewin, K. von Schuckmann, and R.S. Vose, 2021: Changing State of the Climate System. In *Climate Change 2021: The Physical Science Basis. Contribution of Working Group I to the Sixth Assessment Report of the Intergovernmental Panel on Climate Change* [Masson-Delmotte, V., P. Zhai, A. Pirani, S.L. Connors, C. Péan, S. Berger, N. Caud, Y. Chen, L. Goldfarb, M.I. Gomis, M. Huang, K. Leitzell, E. Lonnoy, J.B.R. Matthews, T.K. Maycock, T. Waterfield, O. Yelekçi, R. Yu, and B. Zhou (eds.)]. Cambridge University Press, Cambridge, United Kingdom and New York, NY, USA, pp. 287–422, doi:10.1017/9781009157896.004

Hübner, G., et al. (1992), Total reactive oxidized nitrogen (NO<sub>y</sub>) in the remote Pacific troposphere and its correlation with O<sub>3</sub> and CO: Mauna Loa Observatory Photochemistry Experiment 1988, *J. Geophys. Res.*, 97, 10,427–10,447.

Li, S., Yang Yang, Hailong Wang, Pengwei Li, Ke Li, Lili Ren, Pinya Wang, Baojie Li, Yuhao Mao, Hong Liao (2023), Rapid increase in tropospheric ozone over Southeast Asia attributed to changes in precursor emission source regions and sectors, *Atmos. Environ.*, <https://doi.org/10.1016/j.atmosenv.2023.119776>

Lin, M., Horowitz, L.W., Oltmans, S.J., Fiore, A.M. and Fan, S., 2014. Tropospheric ozone trends at Mauna Loa Observatory tied to decadal climate variability. *Nature Geoscience*, 7(2), pp.136-143.

Logan, J. A.: An analysis of ozonesonde data for the troposphere: Recommendations for testing 3-D models and development of a gridded climatology for tropospheric ozone, *Journal of Geophysical Research: Atmospheres*, 104, 16 115–16 149, 1999.

Mills, G., H. Pleijel, C. S. Malley, B. Sinha, et al. (2018), Tropospheric Ozone Assessment Report: Present-day tropospheric ozone distribution and trends relevant to vegetation, *Elem. Sci. Anth.*, 6(1):47, DOI: <https://doi.org/10.1525/elementa.302>

Ogino, S.-Y., Miyazaki, K., Fujiwara, M., Nodzu, M. I., Shiotani, M., Hasebe, F., et al. (2022). Cause of a lower-tropospheric high-ozone layer in spring over Hanoi. *Journal of Geophysical Research: Atmospheres*, 127, e2021JD035727. <https://doi.org/10.1029/2021JD035727>

Putero, D., et al., Fingerprints of the COVID-19 economic downturn and recovery on ozone anomalies at high-elevation sites in North America and western Europe, *Atmos. Chem. Phys.*, 23, 15693–15709, <https://doi.org/10.5194/acp-23-15693-2023>, 2023.

Saunio, M., Emmons, L., Lamarque, J.-F., Tilmes, S., Wespes, C., Thouret, V., and Schultz, M.: Impact of sampling frequency in the analysis of tropospheric ozone observations, *Atmospheric Chemistry and Physics*, 12, 6757–6773, <https://doi.org/10.5194/acp-12-6757-2012>, 2012.

Seguel, R. J., Castillo, L., Opazo, C., Rojas, N. Y., Nogueira, T., Cazorla, M., Gavidia-Calderón, M., Gallardo, L., Garreaud, R., Carrasco-Escaff, T., and Elshorbany, Y.: Changes in South American Surface Ozone Trends: Exploring the Influences of Precursors and Extreme Events, *EGUsphere* [preprint], <https://doi.org/10.5194/egusphere-2024-328>, 2024.

Škerlak, B., Sprenger, M. and Wernli, H., 2014. A global climatology of stratosphere–troposphere exchange using the ERA-Interim data set from 1979 to 2011. *Atmospheric Chemistry and Physics*, 14(2), pp.913-937.

Škerlak, B., M. Sprenger, S. Pfahl, E. Tyrlis, and H. Wernli (2015), Tropopause folds in ERA-Interim: Global climatology and relation to extreme weather events, *J. Geophys. Res. Atmos.*, 120, 4860–4877, doi:10.1002/2014JD022787.

Szopa, S., V. Naik, B. Adhikary, P. Artaxo, T. Berntsen, W.D. Collins, S. Fuzzi, L. Gallardo, A. Kiendler-Scharr, Z. Klimont, H. Liao, N. Unger, and P. Zanis, 2021: Short-Lived Climate Forcers. In *Climate Change 2021: The Physical Science Basis. Contribution of Working Group I to the Sixth Assessment Report of the Intergovernmental Panel on Climate Change* [Masson-Delmotte, V., P. Zhai, A. Pirani, S.L. Connors, C. Péan, S. Berger, N. Caud, Y. Chen, L. Goldfarb, M.I. Gomis, M. Huang, K. Leitzell, E. Lonnoy, J.B.R. Matthews, T.K. Maycock, T. Waterfield, O. Yelekçi, R. Yu, and B. Zhou (eds.)]. Cambridge University Press, Cambridge, United Kingdom and New York, NY, USA, pp. 817–922, doi:10.1017/9781009157896.008

Tarasick, D. W., I. E. Galbally, et al. (2019), Tropospheric Ozone Assessment Report: Tropospheric ozone from 1877 to 2016, observed levels, trends and uncertainties. *Elem Sci Anth*, 7(1), DOI: <http://doi.org/10.1525/elementa.376>
